# Supplementary material for: The HIV-1 Vpu Protein Induces Apoptosis in Drosophila via Activation of JNK Signaling
Source: PubMed Central journal article supplement (PMC3315533; doi:10.1371/journal.pone.0034310), 2012-03-29
Supplement: pone.0034310.s003.pdf [file pone.0034310.s003.pdf]

**TABLE S1. Molecular analysis of some GOF modifiers of the Vpu-induced wing and eye phenotypes**

| Uyi <sup>1</sup>                        | Gene <sup>2</sup>               | Insertion site <sup>3</sup> | Molecular information / Function                                  | wing <sup>4</sup> | eye <sup>4</sup> | Human homolog <sup>5</sup>       |
|-----------------------------------------|---------------------------------|-----------------------------|-------------------------------------------------------------------|-------------------|------------------|----------------------------------|
| <b>Class 1: Transcriptional factors</b> |                                 |                             |                                                                   |                   |                  |                                  |
| 146                                     | <i>cropped (crop)</i>           | 2nd intron                  | Unknown domain / Function                                         | S                 | 0                | <i>TFAP4</i>                     |
| 181                                     | <b><i>tramtrack (ttk)</i></b>   | -11700 pb                   | Transcription factor / Peripheral nervous system                  | S                 | 0                | BTB/POZ family proteins          |
| 195                                     | <i>lola</i>                     | According to transcripts    | Transcription factor / Axonal guidance                            | S                 | 0                | BTB/POZ family proteins          |
| 1238*                                   | <i>su(H)</i>                    | +32pb (AS)                  | Transcription activator / Notch transduction                      | E                 | E                | <i>CBF1/RBPJ</i>                 |
| 1526                                    | <i>mes<sup>-4</sup></i>         | +40pb (AS)                  | Histone methyl transferase / Gene silencing                       | S                 | 0                | <i>NSD1</i>                      |
| 1877                                    | <i>emc</i>                      | +208pb                      | Transcription repressor / Cell-cell signaling; cell proliferation | L                 | 0                | <i>Inhibitor of DNA binding4</i> |
| 1170                                    | <i>shnurri (shn)</i>            | -3490pb (AS)                | Transcription factor / Wing morphogenesis; Cell proliferation     | E                 | 0                | <i>HIV-EP3</i>                   |
| <b>Class 2: Translation, splicing</b>   |                                 |                             |                                                                   |                   |                  |                                  |
| 1028                                    | <i>Rpl7</i>                     | -1983pb                     | Structural constituent of ribosome / Mitosis                      | 0                 | S                | <i>RPL7</i>                      |
| 1276**                                  | <i>eIF3-S10</i>                 | -85pb                       | Translation initiation factor / Mitosis                           | S                 | E                | <i>EIF3A</i>                     |
| 1652*                                   | <i>heph</i>                     | 4th intron                  | Translation repressor / Notch signaling pathway                   | E                 | E                | <i>hnRNP1/PTB1</i>               |
| 3006                                    | <b><i>fusilli</i></b>           | (AS)                        | mRNA binding / EGFR signaling                                     | S                 | 0                | <i>ESRP1</i>                     |
| 1051**                                  | <i>waharan</i>                  | -38bp (AS)                  | Aminoacyl-tRNA ligase activity; ATP binding / Multiple processes  | E                 | S                | -                                |
| <b>Class 3: Apoptosis</b>               |                                 |                             |                                                                   |                   |                  |                                  |
| 1206                                    | <i>mir-278 stem loop</i>        | NK                          | miRNA-gene / Negative regulation of apoptosis                     | S                 | 0                | -                                |
| 15                                      | <i>anterior open (aop)</i>      | -107bp                      | Transcription repressor / Positive regulation of apoptosis        | S                 | L                | <i>ETV6</i>                      |
| 1835                                    | <b><i>thread (th)/diap1</i></b> | +2088bp                     | Apoptosis inhibitor / Apoptosis                                   | S                 | 0                | <i>IAP</i>                       |
| 1027*                                   | <i>malic enzyme (men)</i>       | 2nd exon                    | Malate dehydrogenase / Regulation of apoptosis                    | S                 | S                | <i>malic enzyme I cytosolic</i>  |
| 1238*                                   | <i>l(2)35Bq</i>                 | -713bp                      | Unknown / Apoptosis inhibitor related                             | E                 | E                | <i>Ciapin1</i>                   |

**Class 4: Ubiquitin, Proteasome**

|       |                                |        |                                                                |   |   |               |
|-------|--------------------------------|--------|----------------------------------------------------------------|---|---|---------------|
| 1339* | <i>partner of paired (ppa)</i> | -45bp  | Unknown domain / Ubiquitin-dependent protein catabolic process | E | E | <i>FBXL14</i> |
| 1323  | <i>CG2218</i>                  | -186bp | Ubiquitin-protein ligase activity / Ubiquitylation             | S | 0 | <i>UBOX5</i>  |

**Class 5: Signaling pathways**

|      |                                |             |                                                              |   |   |                               |
|------|--------------------------------|-------------|--------------------------------------------------------------|---|---|-------------------------------|
| 1261 | <i>CG14945</i>                 | -45bp       | Phospholipase C activity / intracellular signal transduction | 0 | L | <i>Phospholipase C family</i> |
| 1726 | <i>target of wingless(tow)</i> | +126bp (AS) | Unknown domain / Regulation of Smoothened signaling pathway  | S | 0 | -                             |
| 1755 | <i>pxb</i>                     | -43bp (AS)  | Unknown domain / Smoothened signaling pathway                | S | 0 | -                             |
| 1033 | <i>eathbound 1 (ebd1)</i>      | 1st exon    | DNAbinding / Positive regulation of WG signaling             | 0 | S | -                             |

**Class 6: Metabolism**

|      |                          |              |                                                                                  |   |   |                                   |
|------|--------------------------|--------------|----------------------------------------------------------------------------------|---|---|-----------------------------------|
| 1283 | <i>CG2098</i>            | -364bp       | Ferrochelatase / Protoporphyrinogen IX biosynthetic process                      | 0 | E | <i>FECH</i>                       |
| 1030 | <i>CG7910</i>            | +162bp (AS)  | Fatty acid amide hydrolase / Unknown function                                    | S | 0 | <i>fatty acid amide hydrolase</i> |
| 1730 | <i>O-GlcNAcase (oga)</i> | +54bp (AS)   | Hyaluronoglucosaminidase / Unknown function                                      | 0 | L | <i>MGEA5</i>                      |
| 1751 | <i>Ssadh</i>             | +2281bp (AS) | Succinate-semialdehyde dehydrogenase / Gamma-aminobutyric acid catabolic process | S | 0 | <i>ALDH5A1</i>                    |

**Class 7: Cell adhesion, extracellular matrix, cytoskeleton**

|        |                            |            |                                                                           |   |   |                         |
|--------|----------------------------|------------|---------------------------------------------------------------------------|---|---|-------------------------|
| 1228** | <i>CG14394</i>             | -2682bp    | Unknown domain / Tissue regeneration; Cell adhesion                       | S | E | <i>Ninjurin 2</i>       |
| 1526   | <i>CG5514</i>              | -800bp     | Structural constituent of cell wall / Unknown function                    | S | 0 | -                       |
| 1702   | <i>Kuzbanian (Kuz)</i>     | 1st intron | Metallo-endopeptidase / Peripheral nervous system                         | S | 0 | <i>ADAM10</i>           |
| 1332   | <b><i>scr64</i></b>        | +1500bp    | Tyrosine kinase / Actin filament-based process                            | 0 | E | <i>FYN</i>              |
| 1116   | <i>viking (vkg)</i>        | +8bp       | Extracellular matrix structural constituent / Skeletal muscle development | 0 | L | <i>Type IV collagen</i> |
| 1290   | <i>Laminine B1 (LanB1)</i> | -39bp      | Unknown / Organ development; Cell migration; Basement membrane assembly   | 0 | S | <i>Laminin B</i>        |

**Class 8: Traffic**

|       |                            |       |                                 |   |   |                      |
|-------|----------------------------|-------|---------------------------------|---|---|----------------------|
| 3113* | <b><i>liprin alpha</i></b> | -48bp | Protein binding / Axon guidance | L | E | <i>PPF1A1/Liprin</i> |
|-------|----------------------------|-------|---------------------------------|---|---|----------------------|

|                        |                            |                 |                                                                        |   |   |                        |
|------------------------|----------------------------|-----------------|------------------------------------------------------------------------|---|---|------------------------|
| 1051**                 | <i>c(3)G</i>               | -410bp          | Reciprocal meiotic recombination                                       | E | S | <i>Restin/CLIP-170</i> |
| 1228                   | <i>Past1</i>               | +562bp          | Calcium ion binding / Endocytosis                                      | S | 0 | <i>HPAST1/EHD1</i>     |
| 1824                   | <i>CG8451</i>              | -374bp          | Multivitamin transmembrane transporter / Membrane transport            | S | 0 | <i>SSSF</i>            |
| <b>Class 9: Others</b> |                            |                 |                                                                        |   |   |                        |
| 1199                   | <b>grapes (<i>grp</i>)</b> | -99bp           | Ser/thr kinase / Cell cycle; DNA damage checkpoint.                    | 0 | E | <i>CHEK1</i>           |
| 1213                   |                            | -183bp          |                                                                        | 0 | E | <i>CHEK1</i>           |
| 1776                   |                            | -200bp          |                                                                        | 0 | E | <i>CHEK1</i>           |
| 1324                   | <i>CG4552</i>              | +634bp (AS)     | Rab GTPase activator activity / Phagocytosis, engulfment               | S | 0 | <i>TBC1D23</i>         |
| 1751                   | <i>CG4673</i>              | -900bp (AS)     | Structural constituent of nuclear pore / Neurogenesis                  | S | 0 | <i>NPLOC4</i>          |
| 5377                   | <i>amnesiac (amn)</i>      | +1010bp         | Neuropeptide hormone / Learning, memory;Antimicrobial humoral response | E | 0 | -                      |
| 1702                   | <i>B4</i>                  | -1843bp (AS)    | Unknown domain / Imaginal disc development; Circadian rythm.           | S | 0 | -                      |
| 3110                   | <i>cht11</i>               | +1269bp         | ChitinaseII / Chitin catabolic process                                 | E | 0 | -                      |
| 1348                   | <i>CG8003</i>              | -448bp          | Zinc ion binding / Unknown function                                    | E | 0 | <i>ANKMY2</i>          |
| 1730                   | <i>CG3353</i>              | -100bp          | Zinc ion binding / Unknown function                                    | 0 | L | <i>SMYD5</i>           |
| 1001                   | <i>CG32369</i>             | 1st intron (AS) | Zinc ion binding / Proteolysis                                         | S | 0 | <i>LONRF2</i>          |
| 1657                   | <i>Esyt2</i>               | -8553bp         | C2 membrane targeting protein / Unknown function                       | 0 | L | <i>ESYT2</i>           |

<sup>1</sup> P[yellow+ -UAS] insertion line number

<sup>2</sup> In **bold** are the genes verified to be deregulated by the insertion of the P[yellow<sup>+</sup> -UAS] element

<sup>3</sup> Insertion site corresponds to the location of the P element relative to the known/putative transcriptional start site of the candidate gene. All P element insertions are in the sense transcriptional orientation relative to the candidate gene unless specified by (AS). NK: transcription start site not known

<sup>4</sup> Modification of the Vpu-induced phenotype in the wing or in the eye. S: suppressor, E: enhancer, L: léthal, 0: no modification.

<sup>5</sup> - No human homolog identified

\* Insertion lines that modified both wing and eye Vpu-induced phenotypes in the same direction

\*\* Insertion lines that modified wing and eye Vpu-induced phenotypes in the opposite direction
